# Supplementary material for: Cu2+@metal–organic framework-derived amphiphilic sandwich catalysts for enhanced hydrogenation selectivity of ketenes at the oil–water interface
Source: Royal Society of Chemistry journal article supplement (doi:10.1039/d3nr02212a), 2023-01-01
Supplement: d3nr02212a1.pdf [file d3nr02212a1.pdf]

## Supporting Information:

$\text{Cu}^{2+}$ @Metal-Organic Framework Derived Amphiphilic Sandwich  
Catalysts for Enhanced Hydrogenation Selectivity of Ketenes at  
Oil-Water Interface

Jia-Lu Sun, Feng-Di Ren, Yu-Zhen Chen\* and Zhibo Li\*

*College of Chemical Engineering, Qingdao University of Science and Technology, Qingdao  
266042, Shandong, P. R. China*

E-mail: [yzchen@qust.edu.cn](mailto:yzchen@qust.edu.cn)

## 1 Materials and Instrumentation.

Cobalt(II) nitrate hexahydrate ( $\text{Co}(\text{NO}_3)_2 \cdot 6\text{H}_2\text{O}$ , 99%), copper(II) nitrate trihydrate ( $\text{Cu}(\text{NO}_3)_2 \cdot 3\text{H}_2\text{O}$ , 99%), iron(III) nitrate nonahydrate ( $\text{Fe}(\text{NO}_3)_3 \cdot 9\text{H}_2\text{O}$ , 99%), zinc(II) nitrate tetrahydrate ( $\text{Zn}(\text{NO}_3)_2 \cdot 6\text{H}_2\text{O}$ , 98%), terephthalic acid (>99.0%), methanol (>99%), 2-methylimidazole (>98.0%), ethanol (>99%), ethyl acetate ( $\geq 99.5\%$ ) and dichloromethane ( $\geq 99.5\%$ ) were provided by Sinopharm Chemical Reagent Co., Ltd. Multifarious alkene compounds with high-purity were bought from Energy Chemical. All chemicals were obtained from commercial sources and used without further purification. Distilled water with the specific resistance of  $18.25 \text{ M}\Omega \cdot \text{cm}$  was produced by reversed osmosis followed by ion-exchange and filtration (Cleaned Water Treatment Co., Ltd., Qingdao). All reactions were heated by metal sand bath (WATTCAS, LAB-500, <https://www.wattcas.com>). Column chromatography was performed on silica gel (200-300 mesh).

The authors would like to thank Shiyanjia Lab ([www.shiyanjia.com](http://www.shiyanjia.com)) for the materials characterization. X-ray photoelectron spectroscopy (XPS) measurements were performed with a Thermo ESCALAB 250Xi high-performance electron spectrometer using monochromatized AlK $\alpha$  ( $h\nu = 1486.7 \text{ eV}$ ) as the excitation source. Power X-ray diffraction (PXRD) were measured on a Rigaku Saturn 70 diffractometer at 113 K with Mo-K $\alpha$  radiation ( $\lambda = 0.71073 \text{ \AA}$ ). Nitrogen sorption measurements were conducted using a Micromeritics ASAP 2020 system at 77 K. Transmission electron microscopy (TEM) images were acquired on JEOL-2010 with an electron acceleration energy of 200 kV. Scanning electron microscopy (SEM) was conducted using a Zeiss Supra 40 at an acceleration voltage of 5 kV. Reaction yields were traced by gas chromatography (GC, Panna A91 Plus). The content of Cu, Fe and Co in samples was analyzed by an Agilent ICP-

OES 730 inductively coupled plasma atomic emission spectrometer (ICP-AES). Static water/oil contact angles were measured at room temperature using an Optical Contact Angle & Interface Tension Meter SL200KL. Once a drop of water or oil was deposited on sample surface and the contact angle parameter determined from pictures was immediately recorded.

## **2 Preparation of catalysts.**

**2.1 Preparation of ZIF-67 polyhedrons:** We adopted a typical approach to prepare ZIF-67.<sup>1</sup> 0.45 g of  $\text{Co}(\text{NO}_3)_2 \cdot 6\text{H}_2\text{O}$  was dissolved in 3 mL of distilled water and mixed with a solution of 2-methylimidazole (5.5 g) in 20 mL of water, then vigorously stirred for 6 h at room temperature (20 °C). The purple products were collected after centrifugation; the product was adequately washed at least three times with water and methanol and finally dried under vacuum at 75 °C for 12 h.

**2.2 Preparation of ZIF-8 nanocrystals:** A mixture of 80 mL methanol with  $\text{Zn}(\text{NO}_3)_2 \cdot 6\text{H}_2\text{O}$  (1.68 g) was added to another 80 mL of methanol with 3.70 g of 2-methylimidazole and stirred for 24 h.<sup>2</sup> The white powder was obtained from solution via centrifugation, washed thoroughly with methanol three times, and dried in vacuo at 75 °C.

**2.3 Preparation of BMZIF-5:** The synthetic procedure of BMZIF-5 was similar to the preparation of ZIF-8.  $\text{Co}(\text{NO}_3)_2 \cdot 6\text{H}_2\text{O}$  and  $\text{Zn}(\text{NO}_3)_2 \cdot 6\text{H}_2\text{O}$  with a  $\text{Co}^{2+}/\text{Zn}^{2+}$  molar ratio of five was dissolved in 80 mL of methanol.<sup>3</sup> Another solution with 2-methylimidazole (3.70 g) and 80 mL methanol was added into the above solution and stirred for 24 h at room temperature. The total mole of (Zn + Co) was fixed at 5.65 mmol. The purple material was collected by centrifugation and washed

with methanol three times, dried under vacuum at 75 °C overnight. BMZIF-5 powder was dried at 200 °C under vacuum for 24 h prior to use.

**2.4 Preparation of Fe-MIL-88A:**  $\text{Fe}(\text{NO}_3)_3 \cdot 9\text{H}_2\text{O}$  (800 mg, 2 mmol) and fumaric acid (210 mg, 1.8 mmol) were dissolved in 40 mL of N,N-dimethylacetamide (DMA).<sup>4</sup> The mixture heated for 30 min at 110 °C, then cooled to room temperature. The product was collected after centrifugation, washing with DMA and methanol three times. Finally, the Fe-MIL-88A product was dried under vacuum at room temperature overnight.

**2.5 Preparation of Cu@Co@GC/NC and Cu@Fe@GC/C:** Activated  $\text{Cu}^{2+}$ @BMZIF-5 powder (500 mg) was heated to 250 °C for 5 h at a heating rate of 5 °C/min under flowing 20%  $\text{H}_2/\text{Ar}$  atmosphere, further pyrolyzed at 500 °C for 2 h, followed by calcination at 800 °C for 2 h to obtain the final derived carbon materials. To examine the generality of the synthetic protocol,  $\text{Cu}^{2+}$ @Fe-MIL-88A was further employed to synthesize Cu@Fe@GC/C.

**2.6 Preparation of CuCo@GC/NC:** Activated  $\text{Cu}^{2+}$ @BMZIF-5 powder (500 mg) was heated to 500 °C for 2 h at a heating rate of 5 °C/min under flowing 20%  $\text{H}_2/\text{Ar}$ , pyrolyzed by calcination at 800 °C for 2 h at the same condition and finally cooled to room temperature naturally to obtain CuCo@GC porous carbon materials.

**2.7 Preparation of Cu/NC and Co@GC/NC:** The 500 mg of activated  $\text{Cu}^{2+}$ @ZIF-8 or BMZIF-5 was heated to 250 °C for 5 h followed by 500 °C for 2 h at a heating rate of 5 °C/min under flowing 20%  $\text{H}_2/\text{Ar}$  atmosphere; and then the materials were heated to 800 °C and remained there for 2 h. After cooling to room temperature, Cu@NC or Co@GC/NC was obtained.

**2.8 Preparation of Cu@Co/BMZIF-5:** The BMZIF-5 and a certain amount of  $\text{Cu}^{2+}/\text{Co}^{2+}$  precursors were added into aqueous solution (20 mL) containing  $\text{NH}_3\text{BH}_3$  (30 mg). During hydrolysis, Cu

ions were first reduced to give Cu(0) NPs as cores followed by subsequent reduction of  $\text{Co}^{2+}$  to provide Co NPs as outer shell. Then the Cu@Co/BMZIF-5 catalyst was obtained.

### **3 Catalytic Activity Evaluation.**

#### **3.1 Catalytic Study of Cu@Co@GC/NC, Cu/NC, Co@GC/NC, CuCo@GC/NC and Cu@Co/BMZIF-**

**5 Catalysts Toward Dehydrogenation of Ammonia Borane:** At moderate temperature, Cu@Co@GC/NC and 20 mL of ultrapure water were put in a round-bottomed flask (25 mL). The reaction was carried out when 30 mg of  $\text{NH}_3\text{BH}_3$  was placed into above flask under constant stirring. To examine the stability of catalysts, another 30 mg of  $\text{NH}_3\text{BH}_3$  was replenished under the same reaction conditions. For comparison, Cu/NC, Co@GC/NC, CuCo@GC/NC or Cu@Co/BMZIF-5, were investigated for catalytic activity while retaining all other reaction conditions. General isolated procedure products: i) After completion of the reaction indicated by GC, the resulting mixture was extracted with ethyl acetate; ii) The combined organic layers were dried with anhydrous  $\text{Na}_2\text{SO}_4$ , and then concentrated under vacuum to remove the solvent; iii) The residue was purified by column chromatography on silica gel, and eluting with n-hexane to obtain the product.

#### **3.2 Catalytic Performance Test of Cu@Co@GC/NC, Cu/NC, Co@GC/NC, CuCo@GC/NC and**

**Cu@Co/BMZIF-5 Catalysts Toward Chemo-selective Hydrogenation Reactions:** The catalyst (50 mg), olefine compound (0.5 mmol) and ultrapure water (20 mL) were highly dispersed in a 25 mL round-bottomed flask. The reaction started when  $\text{NH}_3\text{BH}_3$  (30 mg) was added to the flask with high-speed stirring under 50 °C. The olefine hydrogenation yield was determined using GC-

Panna A91 Plus analysis. Otherwise, to test the reusability of Cu@Co@GC/NC, the same amount of  $\text{NH}_3\text{BH}_3$  (30 mg) and olefin compound (0.5 mmol) were put into the recycled reaction solution to start the reaction.

### 3.3 Catalytic Performance Test of Cu@Co@GC/NC Catalyst Toward the CO Oxidation

**Reaction:** 25 mg of Cu@Co@GC/NC catalyst was placed in a thin quartz tube filled with the mixed reaction gas (1% CO/Dry air) at a gas flow rate of 30 mL/min. The catalytic system warmed up to the target reaction temperatures at a heating rate of 2 °C/min and kept constant for 30 min to reach a steady state. In the meantime, the composition of effluent gas was on-line identified with Panna A91 Plus gas chromatograph. The CO conversion was calculated based on the CO concentration change in the outlet gases.

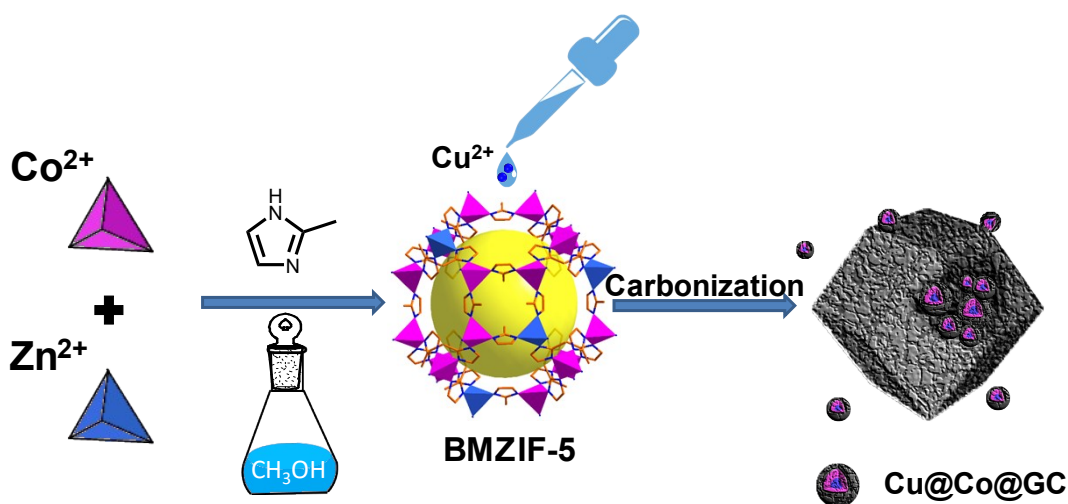

**Scheme S1.** The synthesis process for Cu@Co@GC/NC by a simple calcination of  $\text{Cu}^{2+}$ @BMZIF-5 at designed temperature under  $\text{H}_2/\text{Ar}$  atmosphere.

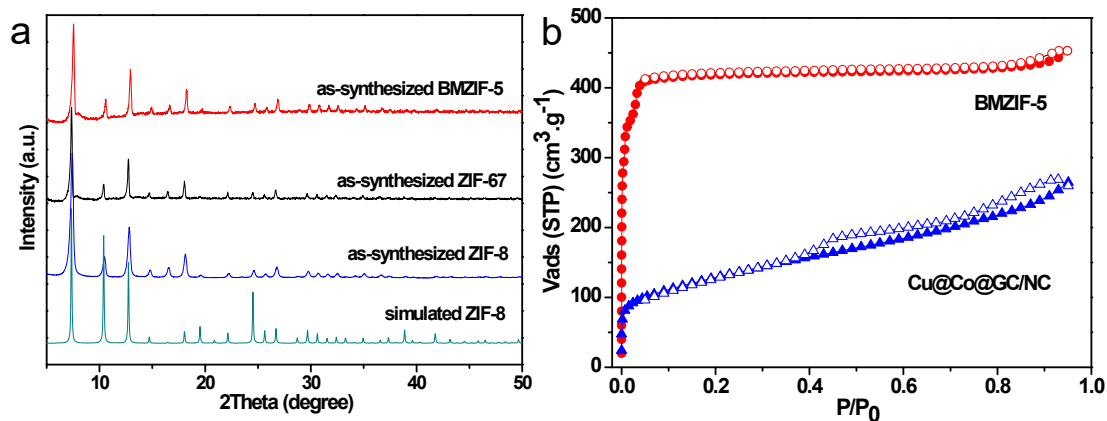

**Fig. S1** (a) Powder X-ray diffraction (PXRD) patterns for as-synthesized MOFs. (b) N<sub>2</sub> sorption isotherms for BMZIF-5 and Cu@Co@GC/NC.

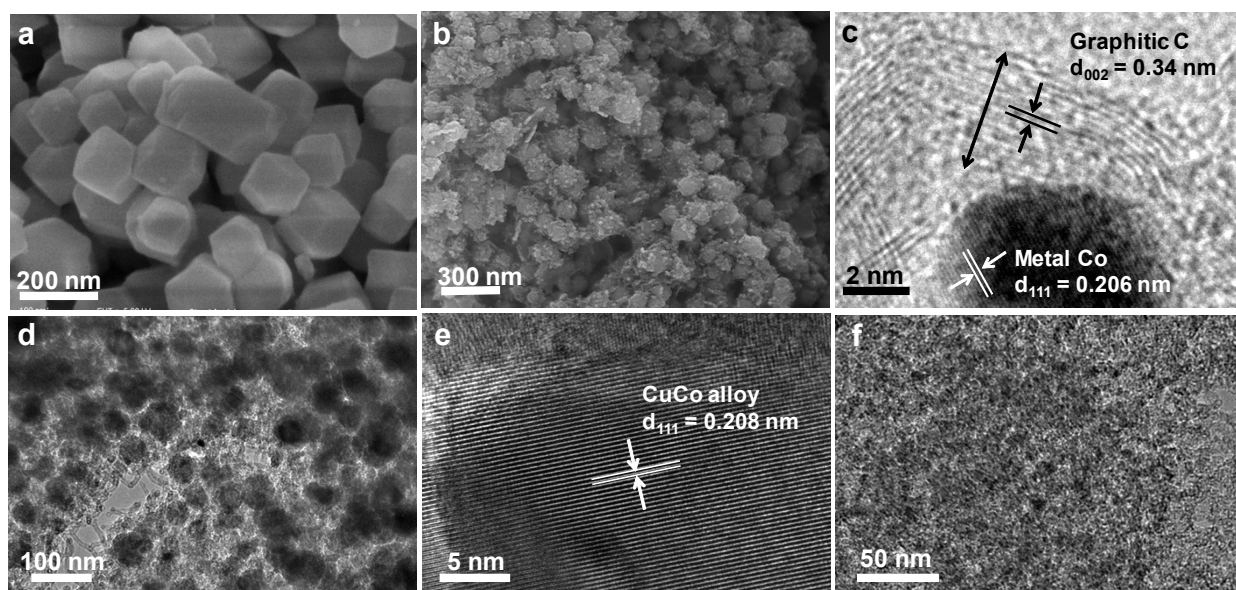

**Fig. S2** SEM images of (a) BMZIF-5, (b) Cu@Co@GC/NC. (c) HRTEM image of carbon shell around Cu@Co NP in Cu@Co@GC/NC, showing Cu@Co NP was tightly wrapped by the well-developed graphitization layers. (d) TEM image of CuCo@GC/NC. (e) HRTEM image of CuCo@GC/NC. (f) TEM image of Cu/NC.

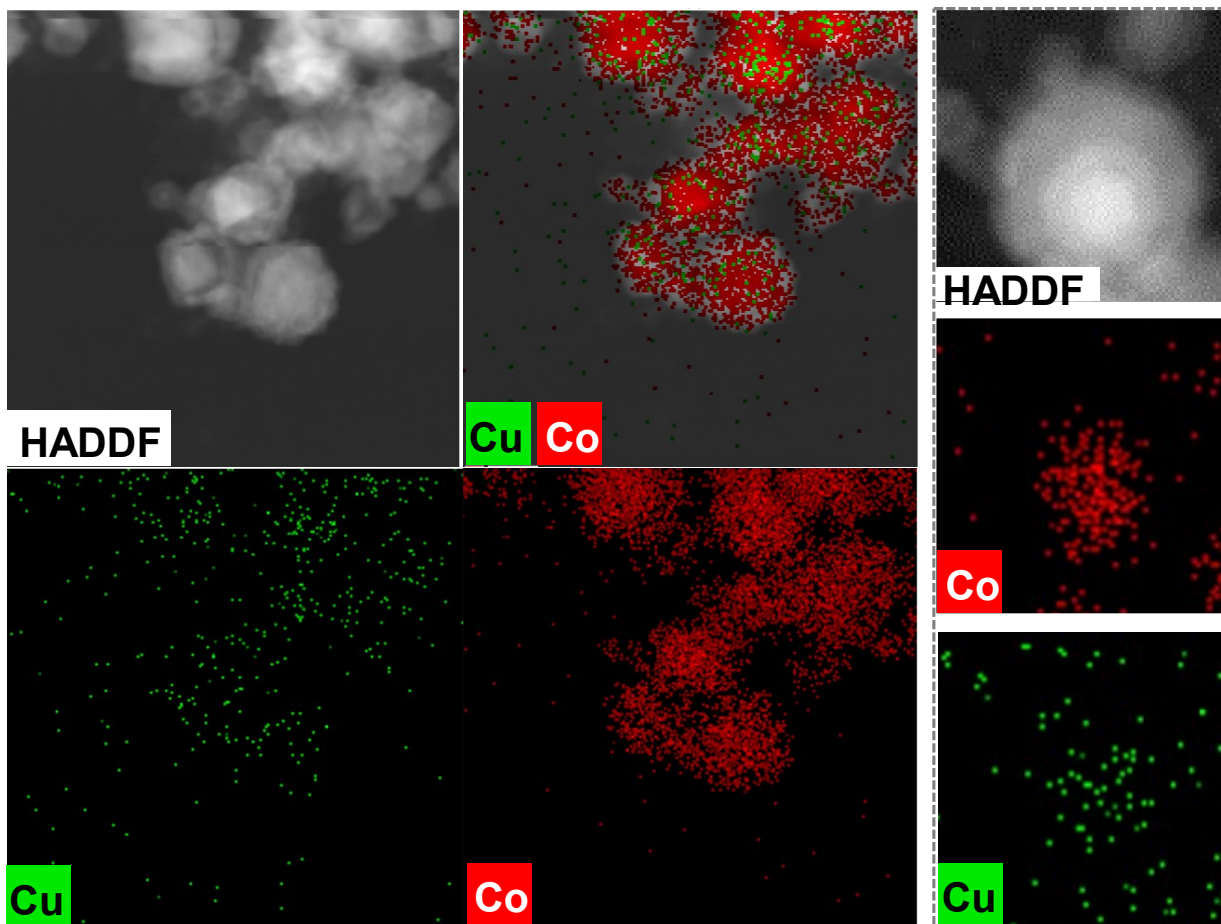

**Fig. S3** HAADF-STEM image of Cu@Co@GC/NC and the corresponding element mappings of Cu and Co.



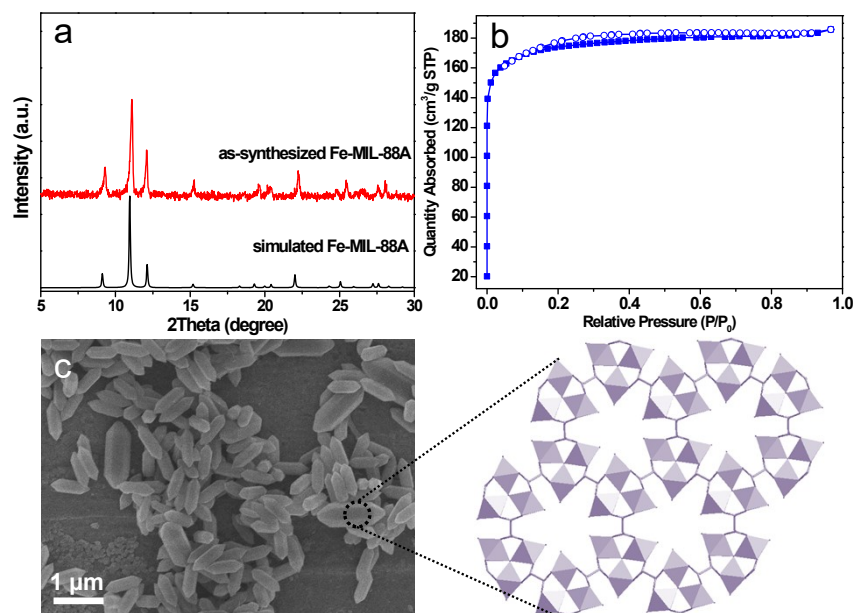

**Fig. S4** (a) PXRD patterns, (b) N<sub>2</sub> sorption isotherms and (c) SEM image and the structure for as-synthesized Fe-MIL-88A.



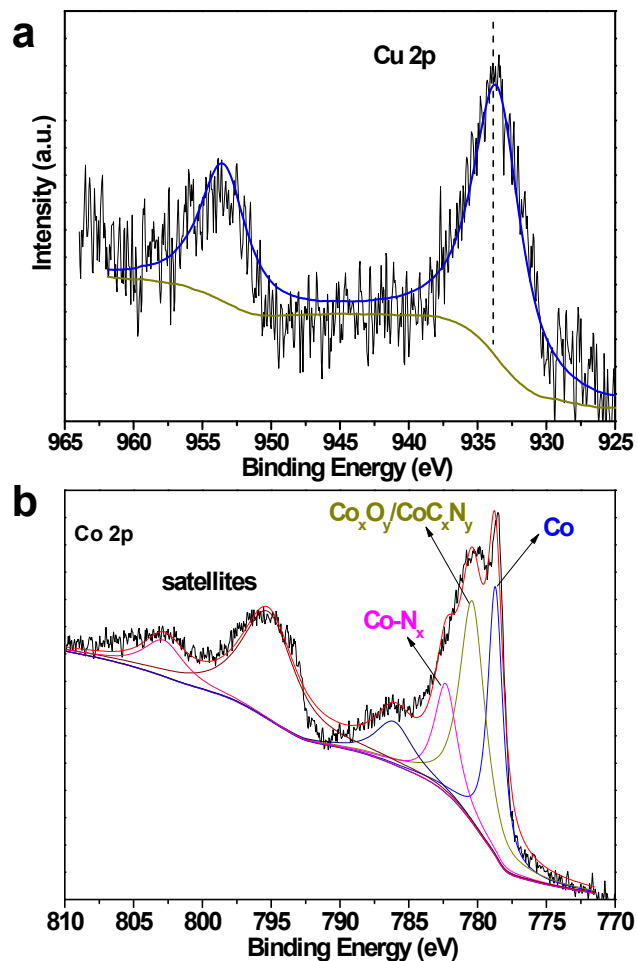

**Fig. S6** X-ray photoelectron spectroscopy (XPS) spectra of (a) Cu 2p and (b) Co 2p for as-synthesized Cu@Co@GC/NC.

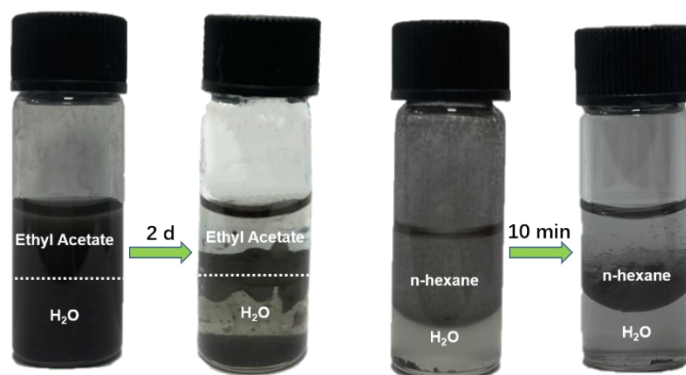

**Fig. S7** The wettability of Cu@Co@GC/NC in a biphasic solution ( $V_{H_2O}/V_{oil} = 1:1$ ) before and after 2 days, the organic upper layer (ethyl acetate or n-hexane) and aqueous bottom layer (water).

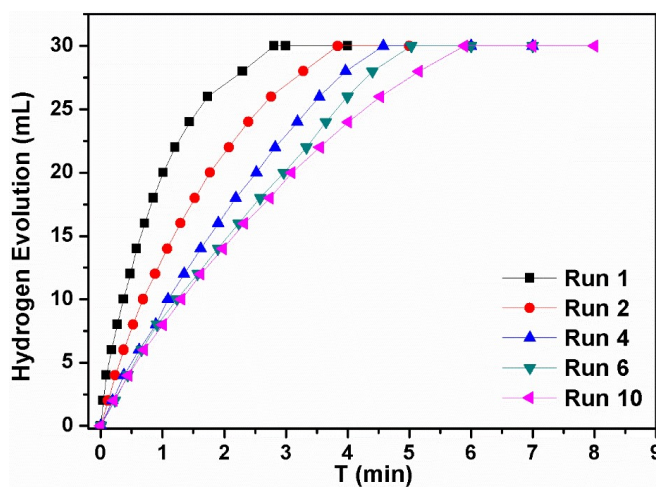

**Fig. S8** Recycling performance for the hydrogen generation from an aqueous  $\text{NH}_3\text{BH}_3$  solution (15 mg in 20 mL  $\text{H}_2\text{O}$ ,  $T = 25\text{ }^\circ\text{C}$ ) over the  $\text{Cu@Co/NC}$ .

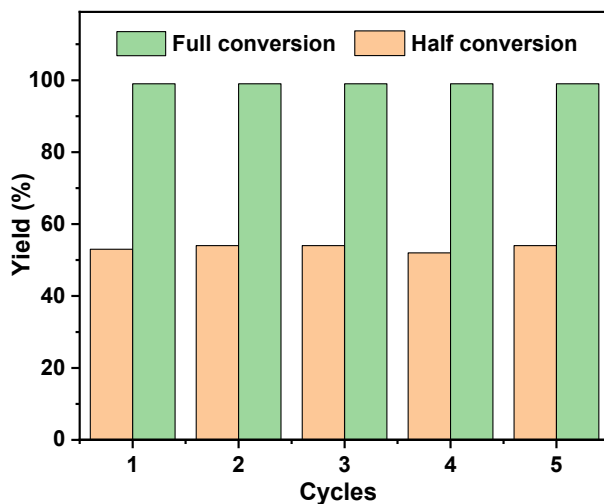

**Fig. S9** Recycling stability of  $\text{Cu@Co@GC/NC}$  toward the cascade reaction of the hydrolysis of  $\text{NH}_3\text{BH}_3$  and hydrogenation of styrene. Reaction conditions: 0.5 mmol styrene, 30 mg  $\text{NH}_3\text{BH}_3$ , 50 mg  $\text{Cu@Co@GC/NC}$ , 20 mL  $\text{H}_2\text{O}$ , and  $T = 50\text{ }^\circ\text{C}$ .

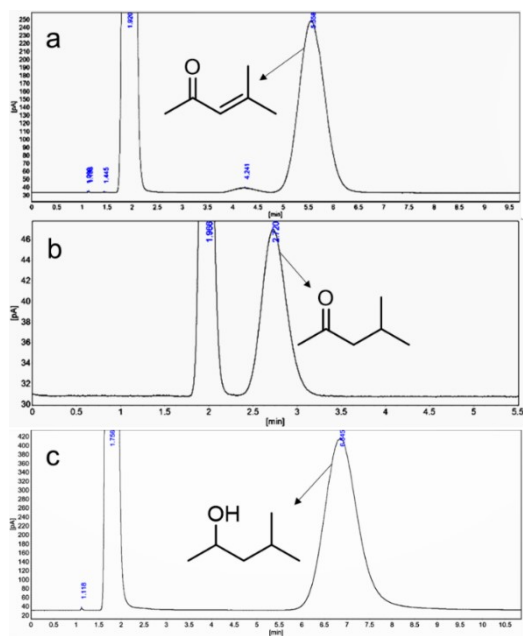

**Fig. S10** Gas chromatography (GC) spectra of (a) 4-methyl-3-penten-2-one, (b) 4-methyl-2-pentanone, and (c) 4-methyl-2-pentanol, respectively.

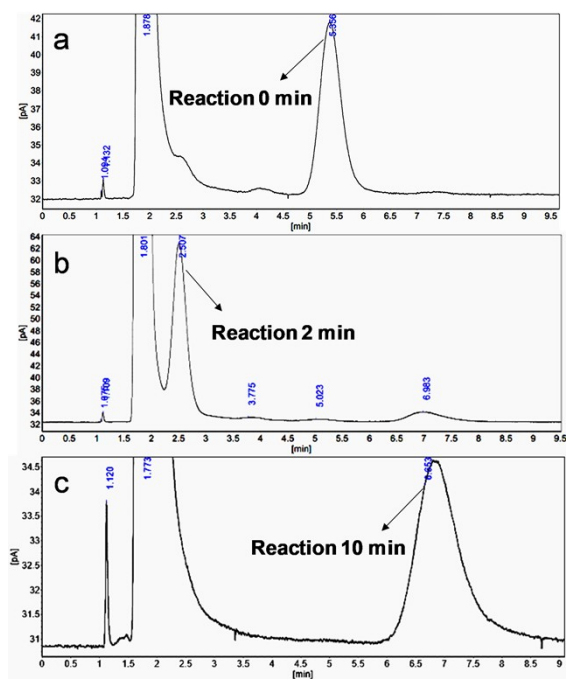

**Fig. S11** Gas chromatography (GC) spectra of 4-methyl-3-penten-2-one catalyzed by Cu@Co@GC/NC at (a) 0 min, (b) 2 min and (c) 10 min, respectively.

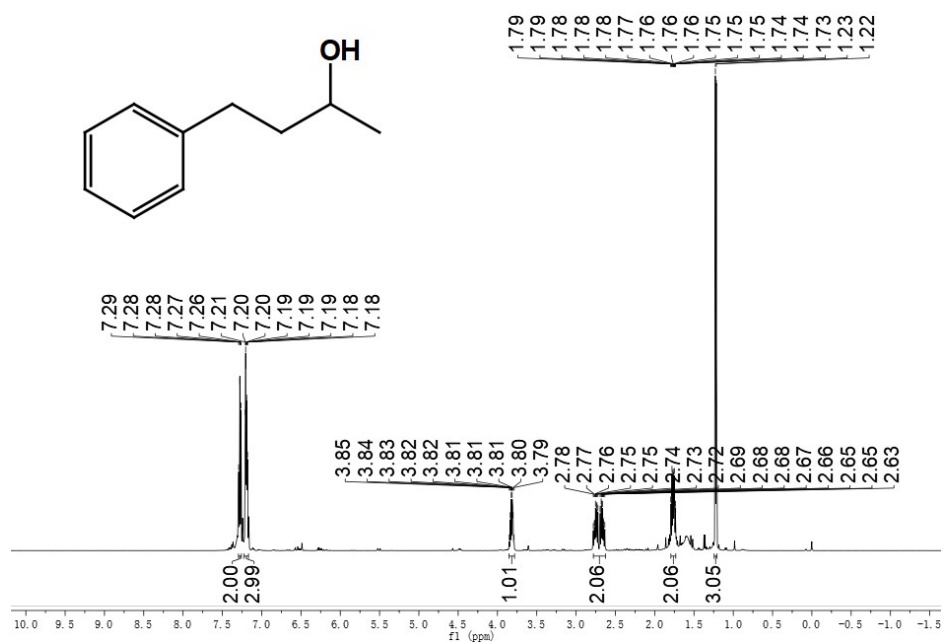

**Fig. S12** Nuclear magnetic resonance (NMR) for product. Reaction conditions: 0.25 mmol methyl cinnamate, 20 mg  $\text{NH}_3\text{BH}_3$ , 20 mg  $\text{Cu@Co@GC/NC}$ , 2 mL  $\text{H}_2\text{O}$ , 50 °C, 40 min.

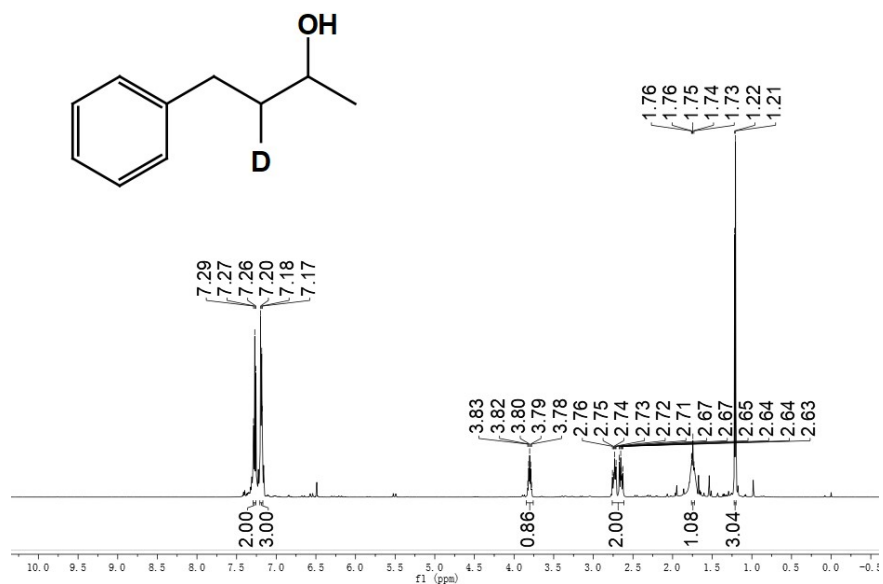

**Fig. S13** Nuclear magnetic resonance (NMR) for product. Reaction conditions: 0.25 mmol methyl cinnamate, 20 mg  $\text{NH}_3\text{BH}_3$ , 20 mg  $\text{Cu@Co@GC/NC}$ , 2 mL  $\text{D}_2\text{O}$ , 50 °C, 40 min.

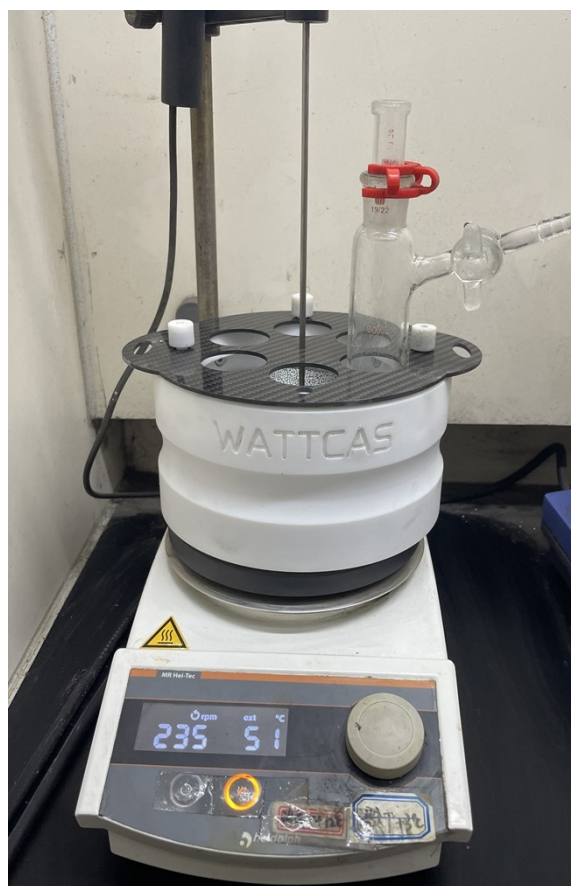

**Fig. S14** Metal sand bath (WATTCAS, LAB-500).

**Table S1.** Inductively coupled plasma atomic emission spectrometry (ICP-AES) analysis result for samples. The results have confirmed that the actual contents of Cu, Co are close to the nominal values.

| Sample      | Low percentage |          |          | High percentage |          |
|-------------|----------------|----------|----------|-----------------|----------|
|             | Cu (wt%)       | Co (wt%) | Zn (wt%) | Cu (wt%)        | Co (wt%) |
| Cu@Co@GC/NC | 1.83           | 46.54    | 0.039    | 24.38           | 46.54    |
| CuCo@GC/NC  | 2.05           | 45.62    | 0.028    | -               | -        |
| Co@GC/NC    | -              | 47.22    | 0.036    | -               | -        |

**Table S2.** The peak positions of different N types and their relative atomic ratios based on XPS analyses for Cu@Co@GC/NC sample.

| Structure | Graphitic-N | Pyridinic-N | Pyrrolic-N | Co-N <sub>x</sub> |
|-----------|-------------|-------------|------------|-------------------|
| BE (eV)   | 401.3       | 398.9       | 400.9      | 399.3             |
| Area      | 1075.56     | 633.17      | 101.88     | 87.53             |
| Ratio (%) | 56.7        | 33.3        | 5.4        | 4.6               |

**Table S3.** The total adsorption energy of styrene and H<sub>2</sub>O molecules on the NG systems with the basis set superposition error (BSSE) correction at the M06-2X/6-31(d,p) level.

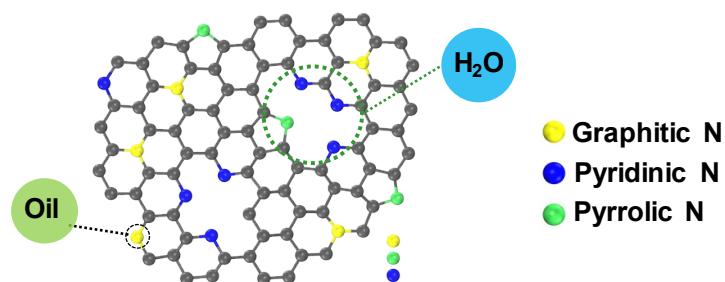

| Adsorbed molecule | Graphitic-N | Pyridinic-N | Pyrrolic-N  |
|-------------------|-------------|-------------|-------------|
|                   | Inter. (eV) | Inter. (eV) | Inter. (eV) |
| Styrene           | -0.55456814 | -0.10189255 | -0.23684597 |
| H <sub>2</sub> O  | -0.43408052 | -0.41992546 | -0.3097256  |

**Table S4.** Performance comparison of Cu@Co@GC/NC with previously reported catalysts for the selective hydrogenation of C=C in ketene compounds.

| Catalyst                                                         | Sol.                  | Con. (%) | Sel. (%) | Yield (%)  | Ref.                   |
|------------------------------------------------------------------|-----------------------|----------|----------|------------|------------------------|
| Cu@Co@GC/NC                                                      | H <sub>2</sub> O      | 100      | 100      | 100        | This work              |
| Au/Fe <sub>2</sub> O <sub>3</sub>                                | ethanol               | 48.2     | 25.3     | 12.2       | 1                      |
| 1,3,2-diazaphospholene                                           | CH <sub>3</sub> CN    | -        | -        | 81         | 2                      |
| Pd/N,O-Carbon                                                    | Toluene               | 100      | 99       | 99         | 3                      |
| 10 wt% Pd/C                                                      | EtOAc                 | 50       | 73       | 37         | Commercially available |
| Pd nanocatalyst                                                  | H <sub>2</sub> O      | 55       | 99       | 55         | 4                      |
| Cu <sub>50</sub> Pd <sub>50</sub> /C <sub>3</sub> N <sub>4</sub> | MeOH/H <sub>2</sub> O | 50       | 99       | 50 (5h)    | 5                      |
| Cu NPs/CB                                                        | Dioxane               | -        | -        | 90 (80 °C) | 6                      |
| Amorphous Ni-P                                                   | H <sub>2</sub> O      | 89.6     | 71.9     | 64.4       | 7                      |



|                |             |      |      |    |   |
|----------------|-------------|------|------|----|---|
| 3-Pt/MOF       | isopropanol | 53   | 58.6 | 31 | 8 |
| MIL-101(Cr)@Pt | THF         | 45.0 | 40.0 | 18 | 9 |

#### 4 References

- 1 J. Qian, F. Sun, L. Qin, *Mater. Lett.*, 2012, **82**, 220-223.
- 2 S. R. Venna, J. B. Jasinski, M. A. Carreon, *J. Am. Chem. Soc.*, 2010, **132**, 18030-18033.
- 3 Y. Z. Chen, C. Wang, Z. Y. Wu, Y. Xiong, Q. Xu, S. H. Yu, H. L. Jiang, *Adv. Mater.*, 2015, **27**, 5010-5016.
- 4 H. J. Lee, W. Cho, E. Lim, M. Oh, *Chem. Commun.*, 2014, **50**, 5476-5479.
